# Supplementary material for: Revealing the Molecular Mechanism of Gastric Cancer Marker Annexin A4 in Cancer Cell Proliferation Using Exon Arrays
Source: PubMed Central journal article supplement (PMC3436854; doi:10.1371/journal.pone.0044615), 2012-09-07
Supplement: pone.0044615.s005.pdf [file pone.0044615.s005.pdf]

**Table S1** AnxA4-upregulated genes (fold-change  $\geq 1.5$ ) in AGS cells based on an exon array classified as plasma membrane proteins with the IPA database.

| <b>Gene Symbol</b> | <b>Description</b>                                          | <b>Fold Change</b> | <b>Type</b>                |
|--------------------|-------------------------------------------------------------|--------------------|----------------------------|
| HMMR               | hyaluronan-mediated motility receptor (RHAMM)               | 2.4                | other                      |
| OR4P4              | olfactory receptor, family 4, subfamily P, member 4         | 2.3                | G-protein coupled receptor |
| OR5R1              | olfactory receptor, family 5, subfamily R, member 1         | 2.2                | G-protein coupled receptor |
| CXADR              | coxsackie virus and adenovirus receptor                     | 2.2                | transmembrane receptor     |
| OR7A17             | olfactory receptor, family 7, subfamily A, member 17        | 2.1                | G-protein coupled receptor |
| SLCO1B3            | solute carrier organic anion transporter family, member 1B3 | 2                  | transporter                |
| CHRM2              | cholinergic receptor, muscarinic 2                          | 2                  | G-protein coupled receptor |
| OR1J2              | olfactory receptor, family 1, subfamily J, member 2         | 1.9                | G-protein coupled receptor |
| STXBP3             | syntaxin binding protein 3                                  | 1.8                | transporter                |
| LAMP2              | lysosomal-associated membrane protein 2                     | 1.8                | enzyme                     |
| CALM2              | calmodulin 2 (phosphorylase kinase, delta)                  | 1.8                | other                      |
| LMBR1              | limb region 1 homolog (mouse)                               | 1.8                | transmembrane receptor     |
| OR4A15             | olfactory receptor, family 4, subfamily A, member 15        | 1.8                | G-protein coupled receptor |
| OR2B2              | olfactory receptor, family 2, subfamily B, member 2         | 1.7                | G-protein coupled receptor |
| SSX2IP             | synovial sarcoma, X breakpoint 2 interacting protein        | 1.7                | other                      |
| CHRNA5             | cholinergic receptor, nicotinic, alpha 5 (neuronal)         | 1.7                | transmembrane receptor     |
| GJA1               | gap junction protein, alpha 1, 43kDa                        | 1.7                | transporter                |
| STEAP1             | six transmembrane epithelial antigen of the prostate 1      | 1.7                | transporter                |

**Table S1. Continued.**

| <b>Gene Symbol</b> | <b>Description</b>                                                      | <b>Fold Change</b> | <b>Type</b>                |
|--------------------|-------------------------------------------------------------------------|--------------------|----------------------------|
| ITFG1              | integrin alpha FG-GAP repeat containing 1                               | 1.7                | other                      |
| OR5T3              | olfactory receptor, family 5, subfamily T, member 3                     | 1.7                | G-protein coupled receptor |
| TMEM67             | transmembrane protein 67                                                | 1.7                | other                      |
| CD24               | CD24 molecule                                                           | 1.6                | other                      |
| IFNGR1             | interferon gamma receptor 1                                             | 1.6                | transmembrane receptor     |
| OR4C3              | olfactory receptor, family 4, subfamily C, member 3                     | 1.6                | G-protein coupled receptor |
| AQP9               | aquaporin 9                                                             | 1.6                | transporter                |
| STX3               | syntaxin 3                                                              | 1.6                | transporter                |
| ANXA7              | annexin A7                                                              | 1.6                | ion channel                |
| TMEM50B            | transmembrane protein 50B                                               | 1.6                | other                      |
| IFNAR1             | interferon (alpha, beta and omega) receptor 1                           | 1.6                | transmembrane receptor     |
| OR2M2              | olfactory receptor, family 2, subfamily M, member 2                     | 1.6                | G-protein coupled receptor |
| SPAM1              | sperm adhesion molecule 1 (PH-20 hyaluronidase, zona pellucida binding) | 1.6                | enzyme                     |
| LPAR6              | lysophosphatidic acid receptor 6                                        | 1.6                | G-protein coupled receptor |
| TAS2R14            | taste receptor, type 2, member 14                                       | 1.6                | G-protein coupled receptor |
| GPR65              | G protein-coupled receptor 65                                           | 1.5                | G-protein coupled receptor |
| SLC16A4            | solute carrier family 16, member 4 (monocarboxylic acid transporter 5)  | 1.5                | transporter                |
| CLDN12             | claudin 12                                                              | 1.5                | other                      |
| CTNNAL1            | catenin (cadherin-associated protein), alpha-like 1                     | 1.5                | other                      |
| PSMG1              | proteasome (prosome, macropain) assembly chaperone 1                    | 1.5                | other                      |
| CD58               | CD58 molecule                                                           | 1.5                | other                      |
| SLC9A6             | solute carrier family 9 (sodium/hydrogen exchanger), member 6           | 1.5                | transporter                |

**Table S1. Continued.**

| <b>Gene Symbol</b> | <b>Description</b>                                    | <b>Fold Change</b> | <b>Type</b>                |
|--------------------|-------------------------------------------------------|--------------------|----------------------------|
| OR4X2              | olfactory receptor, family 4, subfamily X, member 2   | 1.5                | G-protein coupled receptor |
| DEGS1              | delta(4)-desaturase, sphingolipid 1                   | 1.5                | enzyme                     |
| OR8K5              | olfactory receptor, family 8, subfamily K, member 5   | 1.5                | G-protein coupled receptor |
| HLA-DRB5           | major histocompatibility complex, class II, DR beta 5 | 1.5                | transmembrane receptor     |
| GPR82              | G protein-coupled receptor 82                         | 1.5                | G-protein coupled receptor |
| TSPAN8             | tetraspanin 8                                         | 1.5                | other                      |
| ANXA1              | annexin A1                                            | 1.5                | other                      |
