# Supplementary material for: Revealing the Molecular Mechanism of Gastric Cancer Marker Annexin A4 in Cancer Cell Proliferation Using Exon Arrays
Source: PubMed Central journal article supplement (PMC3436854; doi:10.1371/journal.pone.0044615), 2012-09-07
Supplement: pone.0044615.s006.pdf [file pone.0044615.s006.pdf]

**Table S2. A list of primer sequences used for qRT-PCR**

| Primer          | Sequence (5'→3')        |
|-----------------|-------------------------|
| <i>ANXA4</i> -F | accatcggcagggacttgata   |
| <i>ANXA4</i> -R | cagctcttgcacgtcatacag   |
| <i>CDK1</i> -F  | acacaaaactacaggtcaagtgg |
| <i>CDK1</i> -R  | agagtgacaaaacacaatcccc  |
| <i>PBK</i> -F   | ggcctctccgtttatgcagaa   |
| <i>PBK</i> -R   | agcacgataaccaacaatgttg  |
